# Supplementary material for: Oxidative stress battles neuronal Bcl-xL in a fight to the death
Source: PubMed Central journal article supplement — Neural Regen Res. 2020 Aug 10;16(1):12–5. doi: 10.4103/1673-5374.286946 (PMC7818872; doi:10.4103/1673-5374.286946), 2020-08-10
Supplement: NRR-16-12_Suppl1.pdf [file NRR-16-12_Suppl1.pdf]

## OPEN PEER REVIEW REPORT 1

**Name of journal:** Neural Regeneration Research

**Manuscript NO:** NRR-D-20-00092

**Title:** Oxidative stress battles neuronal Bcl-xL in a fight to the death

**Reviewer's Name:** Elizabeth D. Kirby

**Reviewer's country:** USA

**Date sent for review:** 2020-02-25

### COMMENTS TO AUTHORS

This brief review provides a nice overview of the mechanisms by which Bcl-xl is regulated at multiple levels, a process which has relevance to protection from apoptosis. The utility of the review could be improved by two overview figures: 1) A diagram showing the known cellular location(s) of Bcl-xl protein and its binding partners in a basal (healthy) condition and in a condition of oxidative stress. 2) A diagram of the production of functional Bcl-xl protein, from gene to RNA to protein with summaries/depictions of the known regulatory mechanisms present at each step. These figures would help the reader appreciate the larger picture of the author's review.
